# Supplementary material for: Effects of systemic lidocaine versus magnesium administration on postoperative functional recovery and chronic pain in patients undergoing breast cancer surgery: A prospective, randomized, double-blind, comparative clinical trial
Source: PLoS One. 2017 Mar 2;12(3):e0173026. doi: 10.1371/journal.pone.0173026 (PMC5333858; doi:10.1371/journal.pone.0173026)
Supplement: S4 File — (XLSX) [file pone.0173026.s004.xlsx]

## Sheet: Sheet1
group	preOoR40	pre1	pre2	pre3	pre4	pre5	POD1OoR40	pod1	pod2	pod3	pod4	pod5	CPCS1	VAS1	SFMPQ1	SFMPQS1	SFMPQA1	CPCS3	VAS3	SFMPQ3	SFMPQS3	SFMPQA3	basalMg	stopMg	ephedrine	ASA	Comor	age	ht	wt	Mg	Lido	opname	AdOp	Chemo	RT	totalanetime	totaloptime	Input	output	postLOS	HR1	MAP1	SPO21	mins1	des1	BIS1	HR2	MAP2
1	179	52	39	25	31	33	177	52	40	22	31	32	0	0	0	0	0	0	0	0	0	0	0.83	0.82	1	1	0	44	165	61	0	0	1	3	0	0	115	90	600	10	3	86	78	99	4	1.1	79	96	72
1	190	56	42	25	33	34	186	58	41	23	33	31	0	0	0	0	0	0	0	0	0	0	0.82	0.82	0	1	0	54	155	43	0	0	1	2	1	1	95	75	500	5	1	74	104	99	5.4	1	75	80	82
1	186	56	37	25	33	35	174	55	37	23	32	27	0	0	0	0	0	1	2	14.5	11.2	3.3	0.9	0.91	1	2	1	44	158.2	66.2	0	0	1	3	0	0	100	80	950	50	3	83	81	99	5.8	1	78	92	91
1	189	58	42	24	32	33	185	58	40	23	33	31	0	0	0	0	0	0	0	0	0	0	0.8	0.8	0	1	0	54	154	51	0	0	2	3	0	0	105	85	550	20	3	84	101	98	4.8	1.1	76	95	95
1	191	58	42	25	33	33	181	58	38	23	32	30	1	2	10.5	8.2	2.3	1	3	11.2	8.5	2.7	0.9	0.9	1	1	0	41	158.2	47	0	0	1	2	1	1	110	85	600	5	1	52	82	99	4.2	1	79	80	82
1	182	58	32	25	33	34	182	57	38	24	33	30	1	1	9.8	7.1	2.7	1	1	10	8	2	0.83	0.82	0	1	0	38	163	54.7	0	0	2	3	0	0	115	90	850	30	2	87	78	99	5.2	1	79	79	100
1	189	58	40	25	32	34	184	58	38	23	31	32	0	0	0	0	0	0	0	0	0	0	0.8	0.8	1	1	0	50	154	59	0	0	2	1	0	0	150	175	1400	20	2	77	76	99	5.2	1	79	82	71
1	191	59	41	25	33	33	186	56	41	23	33	33	0	0	0	0	0	0	0	0	0	0	0.9	0.9	1	1	0	52	153.6	61.8	0	0	1	3	0	0	95	75	700	30	2	78	100	98	3.9	1.2	76	90	87
1	189	58	39	25	33	34	184	58	40	23	32	31	1	3	13.1	9	4.1	1	2	12.6	10.2	2.4	0.87	0.85	0	1	0	60	150	52.4	0	0	2	1	1	1	120	100	800	20	2	84	91	99	5.2	1.1	78	90	100
1	191	59	39	25	34	34	186	57	41	23	33	32	0	0	0	0	0	0	0	0	0	0	0.82	0.83	1	1	0	49	148.7	48	0	0	1	3	0	0	155	130	800	30	2	60	70	100	5.2	1	79	75	86
1	163	47	30	24	30	32	174	54	36	22	32	30	0	0	0	0	0	0	0	0	0	0	0.91	0.9	0	1	0	35	161	51	0	0	1	2	0	0	105	85	550	30	2	83	110	100	5	1.1	78	88	87
1	164	48	32	32	29	33	172	54	35	22	32	29	0	0	0	0	0	0	0	0	0	0	0.82	0.83	0	1	0	40	166	63	0	0	2	1	0	0	140	105	950	200	2	88	83	99	5.5	0.9	75	77	82
1	169	49	33	25	29	33	171	55	36	22	31	28	0	0	0	0	0	0	0	0	0	0	0.8	0.8	1	1	0	40	160	60	0	0	1	1	1	1	125	95	850	70	4	75	90	99	5.3	1	77	80	80
1	158	45	28	25	29	31	160	50	35	22	30	28	0	0	0	0	0	0	0	0	0	0	0.9	0.9	0	2	1	54	159	60	0	0	1	2	0	0	130	90	700	5	2	83	98	98	5.8	1.1	77	100	96
1	172	52	32	24	29	35	169	54	35	20	31	29	0	0	0	0	0	0	0	0	0	0	0.87	0.89	1	1	0	50	145	42	0	0	2	2	0	0	80	50	400	60	2	95	90	100	5.4	1	78	76	94
1	190	57	42	25	31	35	179	57	37	22	33	30	0	0	0	0	0	1	1	13.1	9.8	3.3	0.9	0.9	0	1	0	44	158	61	0	0	1	3	1	1	130	105	700	40	2	103	74	98	4.9	1.1	75	100	79
1	183	56	35	25	32	35	181	57	37	22	33	32	0	0	0	0	0	0	0	0	0	0	0.83	0.82	0	1	0	41	154	53	0	0	1	2	0	0	165	135	1150	30	3	89	83	99	5	1	78	96	82
1	180	56	34	23	32	35	179	57	37	22	32	31	0	0	0	0	0	0	0	0	0	0	0.87	0.89	0	1	0	48	157.7	55.9	0	0	1	3	0	0	105	75	750	10	2	99	94	99	5	1	78	98	85
1	173	51	33	25	30	34	172	55	35	22	32	30	0	0	0	0	0	1	2	11.9	8.7	3.2	0.91	0.9	0	1	0	45	163.6	61	0	0	1	3	0	0	140	115	750	20	2	92	74	98	5.5	1.1	80	88	81
1	172	52	32	24	29	35	175	54	37	22	31	31	0	0	0	0	0	0	0	0	0	0	0.79	0.8	1	1	0	53	161	58	0	0	1	3	0	0	125	100	505	10	2	56	85	99	0.2	1.1	80	63	78
1	162	47	30	24	29	32	161	50	52	20	30	29	1	3	11.9	8.4	3.5	1	1	12.7	9.5	3.2	0.79	0.8	1	1	0	51	162	44	0	0	1	2	1	1	155	130	1100	20	2	68	91	99	4.9	0.9	78	75	89
1	176	52	35	25	30	34	166	50	36	22	31	28	1	1	6.5	4.1	2.4	1	1	7.4	5.1	2.3	0.91	0.9	0	1	0	40	156	54	0	0	2	2	1	1	130	95	800	25	4	81	86	99	5.1	1.1	76	62	89
1	173	52	34	25	30	32	173	55	36	22	33	28	0	0	0	0	0	0	0	0	0	0	0.92	0.92	1	1	0	50	162.1	63.3	0	0	2	1	1	1	130	90	900	5	1	68	76	100	4.5	0.9	78	77	90
1	172	53	32	24	29	34	171	54	36	20	31	30	0	0	0	0	0	0	0	0	0	0	0.92	0.92	1	1	0	47	159	56	0	0	2	1	1	1	105	80	850	20	2	95	79	100	5	1.1	80	76	77
1	168	52	32	24	28	32	161	49	32	21	31	27	1	1	8.9	6.8	2.1	1	1	13.3	9.5	3.8	0.92	0.93	0	2	1	62	147.8	58.7	0	0	1	3	0	0	110	85	750	5	2	73	92	98	5.2	1	75	91	82
1	164	45	33	25	29	32	161	50	34	22	31	25	1	2	11.5	8.2	3.3	1	3	17.7	13.9	3.8	0.87	0.85	1	2	1	64	160	59.2	0	0	1	3	1	1	120	90	800	5	2	79	79	100	5	1.1	76	85	82
1	176	52	35	25	30	34	171	55	36	22	31	28	0	0	0	0	0	0	0	0	0	0	1.04	1.05	0	2	1	54	147	47	0	0	1	3	0	0	100	75	500	10	3	91	104	99	5.1	1.1	77	80	110
1	171	50	33	25	30	34	173	55	38	22	32	28	0	0	0	0	0	0	0	0	0	0	0.75	0.75	1	2	1	60	156	40	0	0	1	3	0	0	120	100	600	10	3	84	122	98	5.4	1	80	85	95
1	176	52	35	25	30	34	171	55	36	22	31	28	0	0	0	0	0	0	0	0	0	0	0.87	0.86	1	1	0	49	157	50	0	0	1	2	1	0	110	90	750	10	2	96	75	98	5	1	76	84	72
1	162	49	30	23	28	32	160	49	32	20	29	28	0	0	0	0	0	0	0	0	0	0	0.87	0.86	1	1	0	42	155	57	0	0	1	3	0	0	140	115	1000	20	1	66	92	98	5.3	1.1	77	78	82
1	176	52	35	25	30	34	169	52	35	22	31	29	1	1	10.4	7.6	2.8	1	1	13.2	10.6	2.6	0.79	0.8	0	1	0	54	157	59	0	0	1	3	1	0	170	140	1000	20	2	115	94	98	5.1	1.1	79	107	95
1	167	49	31	24	30	33	172	55	36	22	32	29	0	0	0	0	0	0	0	0	0	0	0.79	0.8	1	1	0	46	150	41	0	0	1	2	1	0	190	160	1150	40	2	76	64	99	5.5	1	79	100	65
1	182	58	32	25	33	34	182	57	38	24	33	30	0	0	0	0	0	0	0	0	0	0	0.86	0.87	0	1	0	48	159	60	0	0	2	3	0	0	125	95	900	5	2	81	86	99	5.5	1	81	91	82
1	184	55	39	25	32	33	184	58	38	23	31	32	1	2	11.6	8.6	3	1	2	15.2	12.1	3.1	0.91	0.91	0	1	0	52	159	60	0	0	2	0	1	1	125	95	900	5	2	81	86	99	5.5	1	81	91	82
1	192	57	42	25	35	33	186	56	41	23	33	33	0	0	0	0	0	0	0	0	0	0	0.84	0.83	1	1	0	50	159	60	0	0	2	2	0	0	125	95	900	5	2	81	86	98	5.5	1	81	91	82
1	176	52	35	25	30	34	173	55	36	22	33	28	0	0	0	0	0	1	1	13.6	10.7	2.9	0.93	0.92	1	1	0	43	159	60	0	0	1	3	0	0	125	95	900	5	3	81	86	99	5.5	1	81	91	82
1	169	51	32	24	29	33	171	54	36	20	31	30	0	0	0	0	0	0	0	0	0	0	1.02	1.03	0	1	0	53	159	56	0	0	1	2	0	0	110	85	800	30	3	89	91	99	5.5	1	81	100	96
1	168	52	32	24	28	32	161	49	32	21	31	27	0	0	0	0	0	0	0	0	0	0	1.01	1.01	1	2	1	59	159	56	0	0	1	1	0	0	110	85	800	30	2	89	83	99	5.5	1	81	100	96
1	164	45	33	25	29	32	161	50	34	22	31	25	1	1	10.7	7.8	2.9	1	2	16.4	13.4	3	0.76	0.77	1	1	0	50	159	56	0	0	1	3	1	1	110	85	800	30	1	89	95	99	5.5	1	81	100	96
2	186	54	40	24	33	35	184	56	51	22	32	33	0	0	0	0	0	0	0	0	0	0	0.8	0.8	0	1	0	46	160	53	0	352	1	3	0	0	130	110	900	50	2	66	95	100	5.6	1.1	79	78	98
2	171	47	36	25	30	34	179	53	39	24	32	31	1	2	12.1	8.9	3.2	1	2	9.8	7.5	2.3	0.9	0.9	0	2	1	53	153.8	55	0	364.8	1	3	1	0	120	90	650	5	2	60	92	99	6	1	78	74	86
2	173	48	36	25	30	34	178	53	39	23	33	30	0	0	0	0	0	0	0	0	0	0	0.87	0.89	0	1	0	43	159	53	0	372	2	2	0	0	145	120	600	50	2	83	93	99	3.8	1.1	79	70	85
2	188	57	38	25	33	35	190	59	40	23	35	33	0	0	0	0	0	0	0	0	0	0	0.84	0.85	0	1	0	52	156.4	54.9	0	285.5	1	2	0	0	105	80	450	5	2	63	96	98	3.9	1.2	75	73	98
2	191	57	43	25	32	34	186	59	41	23	32	31	0	0	0	0	0	0	0	0	0	0	0.92	0.92	0	1	0	46	158.9	53.2	0	269.6	1	2	0	0	105	80	450	5	2	63	87	99	4.2	1.1	76	58	79
2	185	57	36	25	32	35	186	59	41	23	32	31	0	0	0	0	0	0	0	0	0	0	0.96	0.98	0	1	0	53	159	56	0	254.8	1	3	1	1	130	105	650	20	2	73	90	97	4	1.1	75	61	82
2	189	58	39	25	33	34	188	58	41	23	33	33	0	0	0	0	0	0	0	0	0	0	0.8	0.8	0	2	1	58	150	53	0	386.6	1	3	1	1	170	130	950	10	2	103	109	96	4.8	1	74	78	82
2	165	49	29	25	29	33	166	50	35	21	31	29	0	0	0	0	0	1	2	9.1	7.1	2	0.9	0.9	0	1	0	35	157.3	55	0	330	1	3	0	0	145	120	900	5	2	72	69	99	4.4	1	74	59	70
2	174	50	36	25	30	33	177	55	37	22	30	33	0	0	0	0	0	0	0	0	0	0	0.79	0.8	1	1	0	41	155.8	58.9	0	352.6	2	2	1	0	135	100	750	5	2	80	119	99	4.5	1	78	82	92
2	175	51	36	24	31	33	179	53	39	23	32	32	0	0	0	0	0	0	0	0	0	0	0.8	0.8	0	1	0	40	156	56	0	290	2	3	0	0	95	75	450	50	2	101	92	99	5.1	1	78	72	90
2	170	51	30	25	30	34	179	53	39	23	32	32	0	0	0	0	0	0	0	0	0	0	0.83	0.83	1	2	1	54	154.1	56.2	0	303.5	2	3	0	0	115	95	700	20	2	80	101	98	5	0.9	77	80	95
2	177	54	34	25	30	34	178	54	38	22	32	32	0	0	0	0	0	0	0	0	0	0	0.8	0.8	0	2	1	55	160	58	0	378	2	3	0	0	135	110	750	10	1	61	85	99	5.1	1	77	60	83
2	184	57	35	25	32	35	185	57	39	23	33	33	0	0	0	0	0	0	0	0	0	0	0.79	0.8	0	1	0	40	156	58	0	295	1	0	0	0	125	105	63	80	4	90	85	99	4.9	1	76	72	84
2	179	53	37	25	29	35	184	57	42	22	32	31	0	0	0	0	0	0	0	0	0	0	0.82	0.83	1	1	0	50	160	56.8	0	286	1	1	1	1	145	110	1400	20	2	90	78	99	5.4	1	78	85	76
2	164	48	29	25	29	33	172	54	37	21	32	28	0	0	0	0	0	0	0	0	0	0	0.9	0.9	1	1	0	45	161	58	0	305	1	3	0	0	130	105	750	30	4	99	86	99	5.1	0.9	78	77	82
2	172	51	32	24	30	35	173	54	38	21	32	28	0	0	0	0	0	0	0	0	0	0	0.83	0.82	1	2	4	51	161	59	0	330	1	2	0	0	85	60	500	20	2	81	71	94	5	0.9	75	86	70
2	170	53	32	23	30	32	169	50	39	20	30	30	1	2	10.1	7.3	2.8	1	1	7.9	5.8	2.1	0.79	0.8	0	1	0	60	151	54	0	305	1	2	1	1	75	50	500	20	2	74	110	98	5	0.9	80	60	85
2	184	55	39	25	31	34	177	56	37	22	31	31	0	0	0	0	0	0	1	5.1	3.7	1.4	0.79	0.8	0	1	0	50	157	67	0	340	2	3	0	0	145	115	850	10	2	77	94	99	5.5	1.1	76	80	93
2	185	57	35	25	33	35	186	58	40	23	35	30	1	1	8.9	6.6	2.3	1	1	9	7	2	0.91	0.9	1	1	0	48	164	56.5	0	305	1	3	1	1	120	95	600	5	2	70	85	99	5.8	1	78	80	75
2	168	50	33	24	29	32	177	55	37	22	30	33	0	0	0	0	0	0	0	0	0	0	0.91	0.9	1	1	0	50	151.7	56.1	0	303	1	3	0	0	140	115	750	5	1	88	90	99	5.5	1	78	68	78
2	195	57	35	25	33	35	187	59	39	23	33	33	0	0	0	0	0	0	0	0	0	0	0.91	0.9	0	1	0	45	162	57	0	310	1	2	0	0	110	85	850	20	2	81	87	99	4.3	1	78	67	80
2	160	48	35	25	29	33	177	56	37	22	31	31	0	0	0	0	0	0	0	0	0	0	0.87	0.85	0	1	0	58	154	50	0	300	1	2	0	0	80	60	650	5	2	105	111	99	5	1	78	75	81
2	183	54	37	25	33	34	186	58	40	23	35	30	1	1	7.8	6	1.8	1	1	8.6	6.8	1.8	0.83	0.83	0	1	0	40	157	55	0	340	1	1	1	1	180	145	1150	130	2	100	77	98	4.6	1	75	93	83
2	174	50	36	25	30	33	177	55	37	22	30	33	0	0	0	0	0	0	0	0	0	0	0.87	0.85	0	1	0	54	153.1	59.1	0	325	2	3	0	0	130	105	850	20	4	83	110	99	4.9	1	78	80	95
2	171	50	33	25	30	33	177	56	37	22	31	31	0	0	0	0	0	0	0	0	0	0	0.83	0.83	1	1	0	44	164	65	0	370	1	3	0	0	215	190	1150	30	5	67	88	100	4.8	1.1	75	65	80
2	188	56	40	25	33	34	186	58	40	23	35	30	0	0	0	0	0	0	0	0	0	0	0.83	0.83	1	1	0	45	154	53.9	0	365	1	3	1	1	155	120	850	20	1	73	74	99	5.2	1	74	82	73
2	158	46	30	24	27	31	166	50	34	22	29	31	0	0	0	0	0	0	0	0	0	0	0.92	0.93	1	1	0	44	162	57	0	320	2	1	1	1	125	100	850	10	2	79	78	99	5	1.1	79	75	77
2	164	47	32	25	29	31	167	51	35	22	31	28	1	2	9.2	7.1	2.1	1	3	13.5	9.6	3.9	0.92	0.93	0	1	0	44	153	54	0	335	1	1	1	1	145	115	850	150	1	102	80	100	4.7	1	75	95	79
2	188	56	40	25	32	35	187	59	39	23	33	33	0	0	0	0	0	0	0	0	0	0	0.87	0.86	0	1	0	41	160	50	0	292	2	3	1	0	120	95	650	50	2	68	79	100	4.7	1.1	78	63	85
2	174	53	33	25	30	33	177	55	37	22	30	33	0	0	0	0	0	0	0	0	0	0	0.91	0.9	0	1	0	54	158	56	0	316	1	3	0	0	100	75	550	5	1	90	96	99	4.8	1	80	83	92
2	192	58	40	25	34	35	187	59	39	23	33	33	0	0	0	0	0	0	0	0	0	0	0.91	0.9	0	1	0	55	157.5	56.1	0	338	2	3	1	0	155	125	850	30	2	84	87	98	4.3	1.1	79	70	80
2	175	57	36	25	32	35	186	59	41	23	32	31	0	0	0	0	0	0	0	0	0	0	0.92	0.93	0	1	0	52	160	56.8	0	320	1	3	0	0	110	85	850	30	3	81	87	98	4.9	1.1	80	80	95
2	189	58	39	25	33	34	188	58	41	23	33	33	0	0	0	0	0	0	0	0	0	0	0.96	0.96	1	1	0	55	160	56.8	0	350	1	2	0	0	130	105	850	30	3	81	87	98	4.9	1.1	80	80	95
2	165	49	29	25	29	33	166	50	35	21	31	29	1	1	7.1	6	1.1	1	2	8.9	6.9	2	0.89	0.89	1	2	1	57	160	56.8	0	310	1	0	1	1	100	80	850	30	2	81	87	98	4.9	1.1	80	80	95
2	174	50	36	25	30	33	177	55	37	22	30	33	0	0	0	0	0	0	0	0	0	0	0.84	0.85	0	1	0	47	160	56.8	0	305	1	3	0	0	130	105	850	30	2	81	87	98	4.9	1.1	80	80	95
2	175	51	36	24	31	33	179	53	39	23	32	32	0	0	0	0	0	0	0	0	0	0	0.86	0.86	1	1	0	51	160	56.8	0	360	1	1	0	0	130	105	750	30	2	90	96	98	4.9	1.1	80	93	83
2	172	53	30	25	30	34	179	53	39	23	32	32	0	0	0	0	0	0	0	0	0	0	0.81	0.83	0	1	0	40	156	58	0	295	2	3	0	0	125	105	750	30	2	90	96	98	4.9	1.1	80	93	83
2	177	54	34	25	30	34	178	54	38	22	32	32	0	0	0	0	0	0	0	0	0	0	0.93	0.94	1	1	0	59	156	58	0	280	2	2	0	0	125	105	750	30	2	90	96	98	4.9	1.1	80	93	83
2	175	53	32	24	31	35	173	54	38	21	32	28	0	0	0	0	0	0	0	0	0	0	0.77	0.77	1	1	0	44	156	58	0	310	2	3	0	0	125	105	750	30	1	90	96	98	4.9	1.1	80	93	83
3	177	55	35	25	33	34	178	57	35	23	32	31	1	1	9.4	7.3	2.1	1	1	9.3	7	2.3	0.8	1.3	0	1	0	55	153	60	3660	0	2	3	1	1	215	195	1050	20	2	72	108	100	5.2	1	82	75	102
3	186	56	38	25	33	34	181	58	39	21	33	30	0	0	0	0	0	0	0	0	0	0	0.86	1.34	0	1	0	46	150	52	3120	0	2	3	1	0	140	115	700	20	3	76	85	99	5.3	1.1	74	68	80
3	168	50	32	24	30	32	166	48	40	21	30	27	0	0	0	0	0	0	0	0	0	0	0.85	1.32	1	1	0	48	150.8	49.7	2982	0	1	0	0	0	130	105	800	300	2	82	116	98	4.5	1	79	78	94
3	165	47	32	24	29	33	163	51	34	21	29	28	1	1	9.8	7.4	2.4	1	1	10.3	7.4	2.6	0.94	1.36	1	1	0	47	163.1	64.8	2392	0	2	3	1	1	120	95	800	80	1	83	89	100	5	1	75	75	87
3	176	52	36	25	30	33	173	54	37	22	30	30	0	0	0	0	0	0	0	0	0	0	0.84	1.3	0	1	0	54	153.6	50	3700	0	1	3	0	0	225	200	1450	40	2	109	101	99	4.5	1	79	88	80
3	163	48	30	24	28	33	172	53	37	22	31	29	0	0	0	0	0	0	0	0	0	0	0.9	1.35	0	1	0	56	154.4	57.1	2512	0	2	2	0	0	85	65	650	10	2	105	98	98	4.2	1	77	82	79
3	181	57	34	25	34	31	181	58	35	23	33	32	0	0	0	0	0	0	0	0	0	0	0.91	1.35	0	1	0	56	154.1	51.7	2482	0	1	3	0	0	90	70	450	30	2	84	100	98	5.2	1.1	78	69	86
3	182	58	34	25	33	32	182	59	37	23	33	31	0	0	0	0	0	0	0	0	0	0	1.01	1.41	0	1	0	52	156	63	3528	0	2	3	1	0	120	95	600	70	2	80	96	99	4.8	1.1	75	62	80
3	187	57	37	25	33	35	178	56	37	23	32	30	1	1	9.6	7.2	2.4	1	2	12.5	9	3.5	1	1.38	0	1	0	40	158	61	3480	0	2	3	1	1	145	120	850	50	2	98	83	98	4.5	1	74	76	79
3	185	53	40	25	33	34	181	56	36	23	33	31	0	0	0	0	0	1	1	5.9	4.6	1.3	0.96	1.19	0	1	0	45	161.9	52.4	2510	0	1	3	0	0	100	80	450	30	2	74	83	99	4.5	1	76	59	67
3	161	46	30	24	30	31	175	53	39	23	33	32	0	0	0	0	0	0	0	0	0	0	0.89	1.24	0	1	0	41	153.3	56.3	2690	0	1	3	0	0	100	80	600	20	2	78	79	99	5	1	80	62	70
3	175	51	34	25	30	35	173	54	36	22	32	30	0	0	0	0	0	0	0	0	0	0	1.04	1.37	0	1	0	38	162.8	55.7	3250	0	1	3	1	0	95	70	600	5	4	79	89	100	5.2	1.1	78	81	89
3	164	47	32	24	29	32	170	53	37	23	30	28	0	0	0	0	0	0	0	0	0	0	0.89	1.33	1	1	0	47	160	57	3300	0	1	2	0	0	115	80	800	40	2	72	87	99	5.6	1	75	80	79
3	164	48	31	25	28	32	173	54	38	21	32	28	0	0	0	0	0	0	0	0	0	0	0.91	1.35	1	1	0	43	154	57.3	3000	0	1	3	0	0	100	80	650	35	2	89	73	99	4.8	1.1	76	87	74
3	168	50	31	25	29	33	172	55	37	20	31	29	1	2	10.9	7.9	3	1	3	14.2	9.8	4.4	0.98	1.45	1	2	1	64	157	53	2950	0	2	3	1	1	90	65	650	5	2	75	92	95	4.8	1	76	99	76
3	175	51	34	25	30	35	175	55	37	22	32	30	0	0	0	0	0	0	0	0	0	0	0.84	1.5	0	1	0	45	161	55	2850	0	1	3	0	0	155	125	1100	50	2	75	91	99	4.9	1.1	79	92	80
3	187	56	41	24	32	34	185	58	39	22	33	33	0	0	0	0	0	0	0	0	0	0	0.84	0	0	1	0	46	151	56	2960	0	1	1	0	0	80	55	500	10	2	73	108	98	5.4	1.1	77	69	80
3	170	50	32	24	30	34	172	53	37	22	31	29	0	0	0	0	0	0	0	0	0	0	0.84	0	1	2	1	53	151.3	51.2	3050	0	2	3	1	1	110	85	750	10	2	120	115	96	5.2	1	77	90	96
3	183	55	36	25	33	34	181	56	38	24	32	31	0	0	0	0	0	0	0	0	0	0	0.91	1.35	0	1	0	54	160	51	2800	0	2	3	0	0	120	95	700	10	2	67	92	99	5.4	1.1	77	69	82
3	182	58	31	25	33	35	183	58	39	23	33	32	0	0	0	0	0	0	0	0	0	0	0.78	1.36	1	1	0	51	157.8	48.2	2620	0	1	2	0	0	110	90	800	30	2	70	71	98	5.8	1.1	77	95	87
3	175	51	34	25	30	35	175	55	37	22	32	30	1	1	7.2	5.5	1.7	1	1	7.1	5.2	1.9	0.91	1.35	0	1	0	54	158	54	2960	0	1	3	1	1	175	145	1150	5	3	85	115	99	4.8	1.1	77	70	92
3	182	58	31	25	33	35	184	59	37	23	34	33	0	0	0	0	0	0	0	0	0	0	0.89	1.34	1	1	0	29	156	50.4	2850	0	2	3	0	0	120	95	800	50	2	78	92	99	4.7	1.1	75	90	76
3	190	58	39	25	33	35	182	58	39	23	33	31	0	0	0	0	0	0	0	0	0	0	0.84	1.38	0	2	2	51	160	54	3000	0	1	2	0	0	120	95	650	20	1	120	109	99	4.9	1	78	72	83
3	173	50	34	25	30	34	175	55	37	22	32	30	0	0	0	0	0	0	0	0	0	0	0.84	0	0	1	0	46	165.7	57.4	3140	0	1	3	0	0	160	130	800	20	2	115	90	99	5	1	76	86	75
3	183	54	36	25	34	34	180	58	37	23	32	30	0	0	0	0	0	0	0	0	0	0	0.94	1.36	1	1	0	43	163	54	3070	0	1	3	1	1	185	155	1550	50	4	78	84	99	4.8	1.1	77	70	75
3	171	50	35	24	30	32	174	54	36	22	32	30	0	0	0	0	0	0	0	0	0	0	0.94	1.4	1	2	2	59	149.5	55.5	3160	0	1	2	0	0	140	115	850	30	2	59	88	96	4.8	1	76	75	81
3	159	43	32	24	29	31	165	50	34	23	32	27	1	2	11.2	7.7	3.5	1	2	13.1	9	4.1	0.78	1.36	1	1	1	45	163.8	54.9	3100	0	1	3	1	1	100	80	600	20	1	78	75	97	4.8	1	81	80	82
3	180	58	31	25	32	34	181	56	38	23	33	33	0	0	0	0	0	0	0	0	0	0	0.78	1.38	0	1	0	48	160	52	3000	0	1	3	0	0	115	90	650	30	2	100	97	99	4.5	1	80	80	104
3	170	48	33	24	31	34	175	55	37	22	32	30	0	0	0	0	0	0	0	0	0	0	0.78	1.36	1	2	1	65	158	51	3020	0	2	2	0	0	115	90	800	20	2	80	108	98	4.9	1	80	85	84
3	175	51	34	25	30	35	173	56	35	22	31	30	0	0	0	0	0	0	0	0	0	0	0.78	1.36	0	2	2	46	160	63.3	3250	0	2	0	0	0	120	90	650	10	2	94	93	97	5.9	0.9	81	90	100
3	181	54	36	25	33	33	181	56	38	23	32	31	0	0	0	0	0	0	0	0	0	0	0.84	0	1	1	0	40	156.1	46.7	2620	0	2	3	0	0	215	185	1300	30	2	78	84	99	4.2	1.1	79	88	80
3	172	49	34	25	30	35	174	56	34	23	32	30	0	0	0	0	0	0	0	0	0	0	0.78	1.36	1	1	0	37	160.2	71.8	3080	0	2	0	1	1	145	120	1250	20	2	113	72	100	5	1	80	90	75
3	170	50	32	24	30	34	172	53	37	22	31	29	0	0	0	0	0	0	0	0	0	0	0.79	1.33	0	1	0	43	160	63.3	3050	0	1	2	0	0	120	95	800	50	2	89	73	98	5	1	80	90	75
3	183	55	36	25	33	34	181	56	38	24	32	31	0	0	0	0	0	0	0	0	0	0	0.9	1.4	1	1	0	52	160	63.3	2960	0	1	2	1	1	105	85	700	10	2	89	73	98	5	1	80	95	87
3	182	58	31	25	33	35	183	58	39	23	33	32	0	0	0	0	0	0	0	0	0	0	0.79	1.35	1	2	1	58	158	54	3000	0	1	3	0	0	140	115	650	5	2	59	88	98	5	1	80	95	87
3	174	50	34	25	30	35	175	55	37	22	32	30	0	0	0	0	0	0	0	0	0	0	0.88	0	0	1	0	41	158	54	2980	0	1	3	1	1	120	90	650	5	3	59	88	98	5	1	80	95	87
3	182	58	31	25	33	35	184	59	37	23	34	33	0	0	0	0	0	0	0	0	0	0	0.87	1.32	1	1	0	47	160	57	3100	0	2	1	0	0	140	115	650	5	2	59	88	99	5	1	80	90	96
3	185	55	37	25	33	35	182	58	39	23	33	31	1	1	9.3	7.4	1.9	1	2	12.3	8.6	3.7	0.99	1.36	1	1	0	43	160	57	3150	0	2	3	1	0	140	115	650	5	2	59	88	98	5	1	80	90	96
[truncated: 26 more columns]
